# Supplementary material for: SREIS-D
Source: Atypon-hosted journal article supplement (doi:10.1026/0012-1924/a000248), 2020-05-18
Supplement: 0012-1924_a000248_esm1.pdf [file 0012-1924_a000248_esm1.pdf]

**ESM 1. SREIS-D Faktorenstruktur mit vier bzw. fünf Faktoren durch Aufteilung des Faktors Emotionsregulation in intra- und interpersonal mit EI als Generalfaktor zweiter Ordnung**

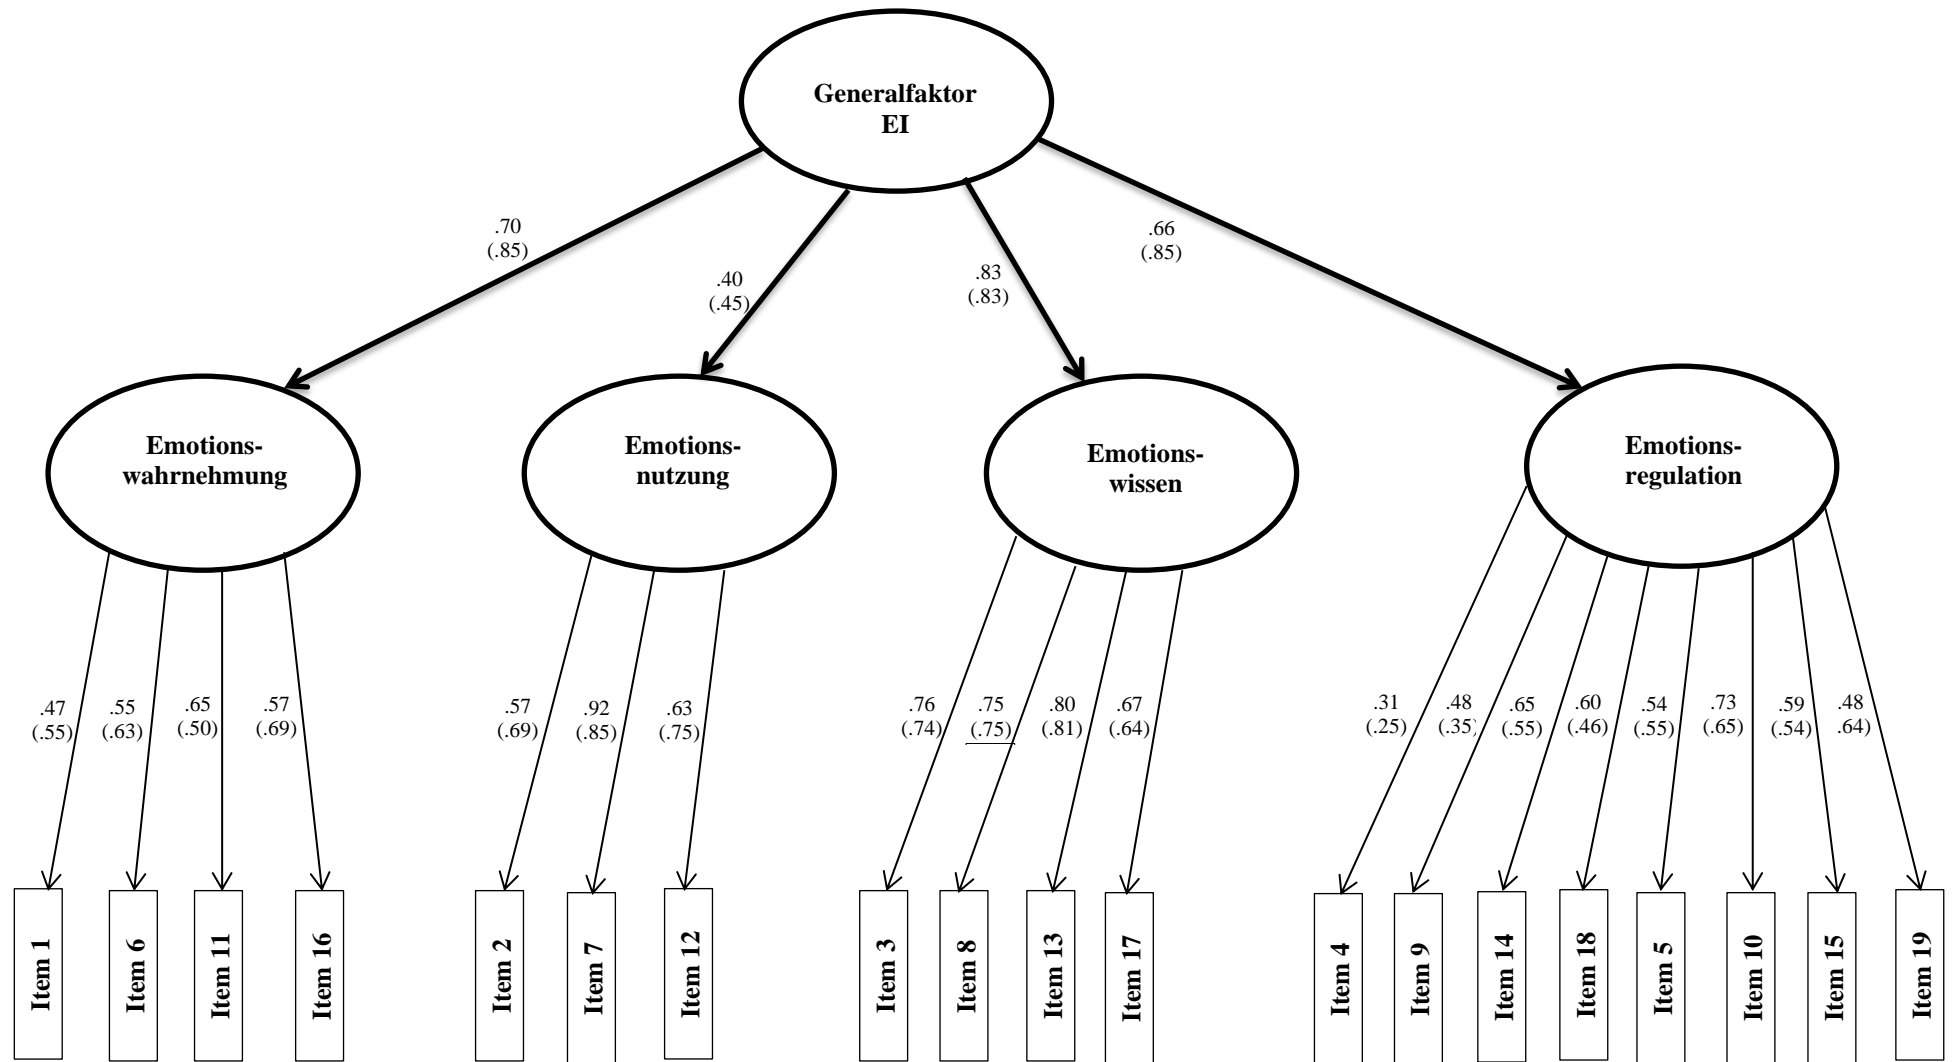

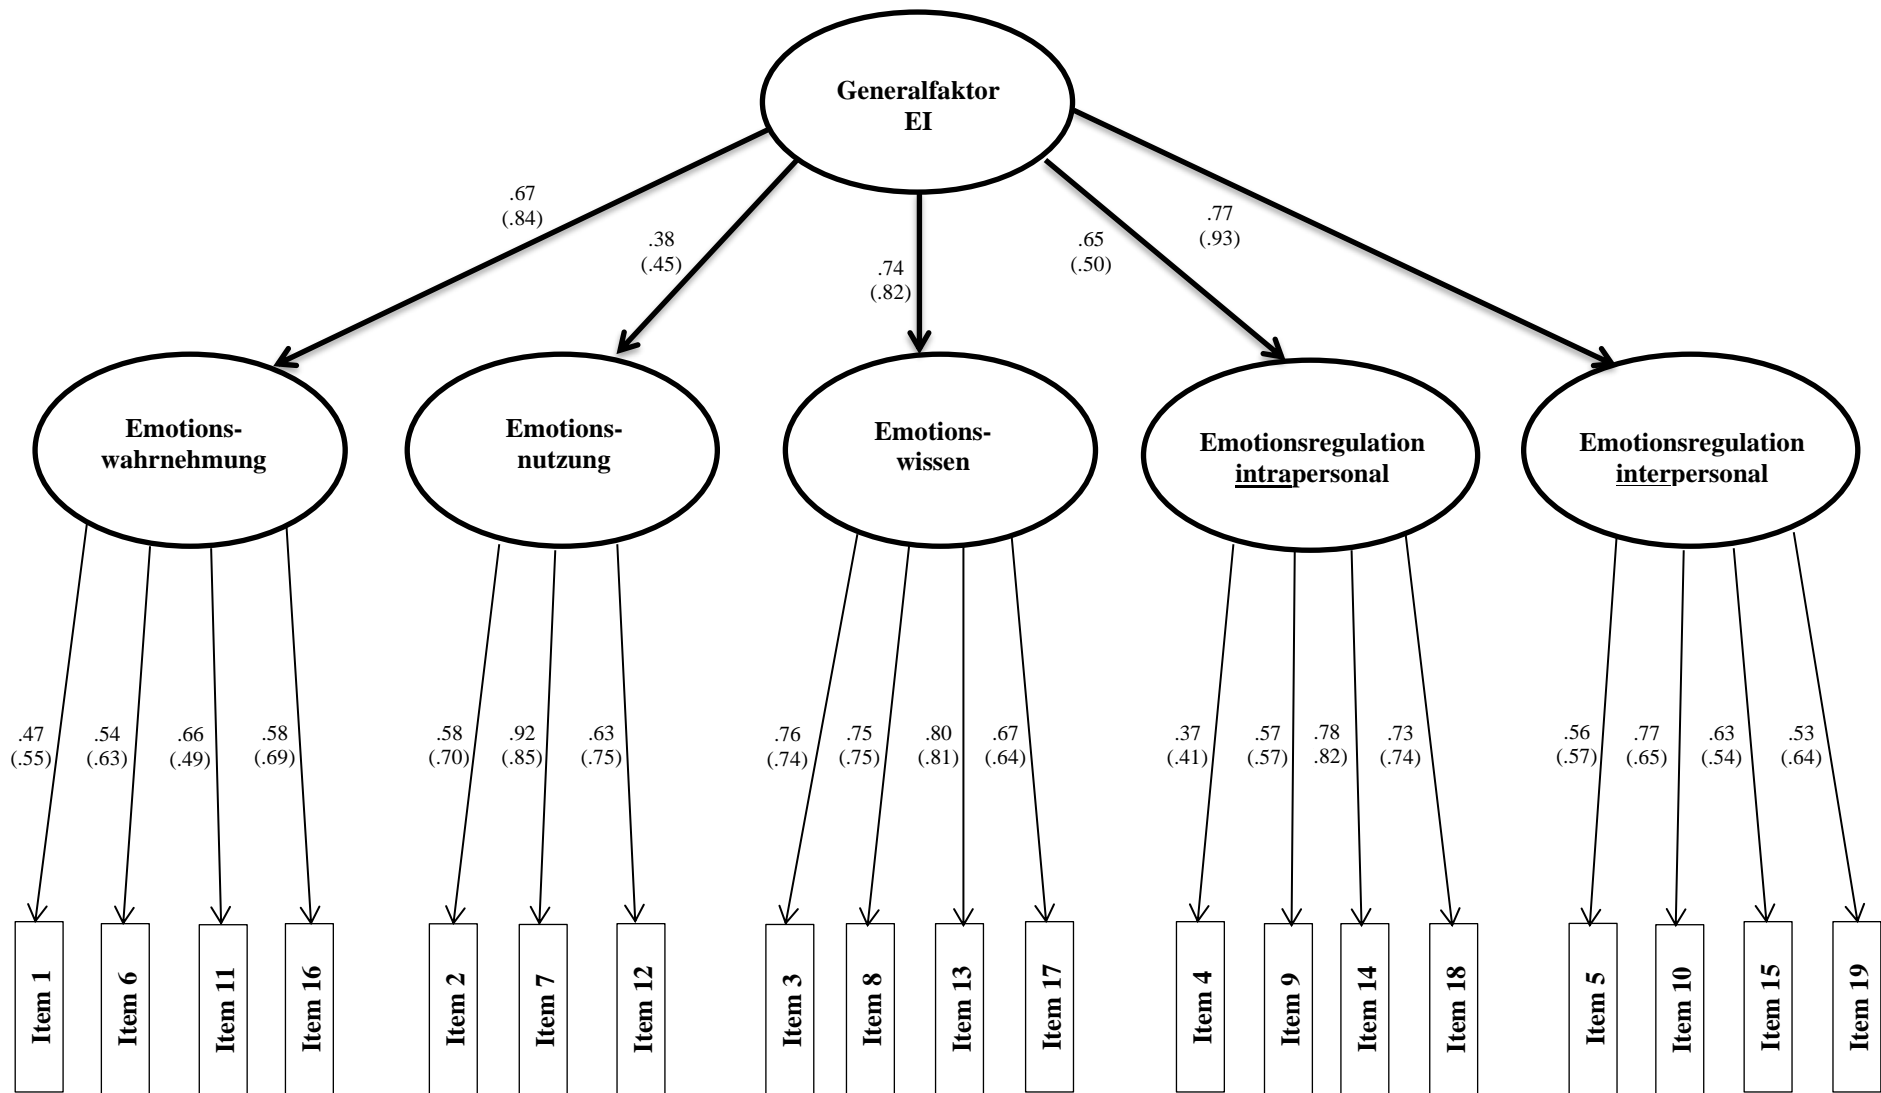

Anmerkung: Werte für die Pfadkoeffizienten der nicht-klinischen Kontrollgruppe ( $n = 218$ ) stehen jeweils unter dem Wert der klinischen Stichprobe ( $n = 338$ ) in Klammern. Zur besseren Darstellung und Vergleichbarkeit der Modelle mit vier vs. fünf Faktoren wurden in der Abbildung die Fehlerterme (Messfehler der Items) nicht mit in die Ansicht aufgenommen.

Modell zur metrischen Invarianz mit gleichgesetzten Faktorladungen (standardisierte Werte)

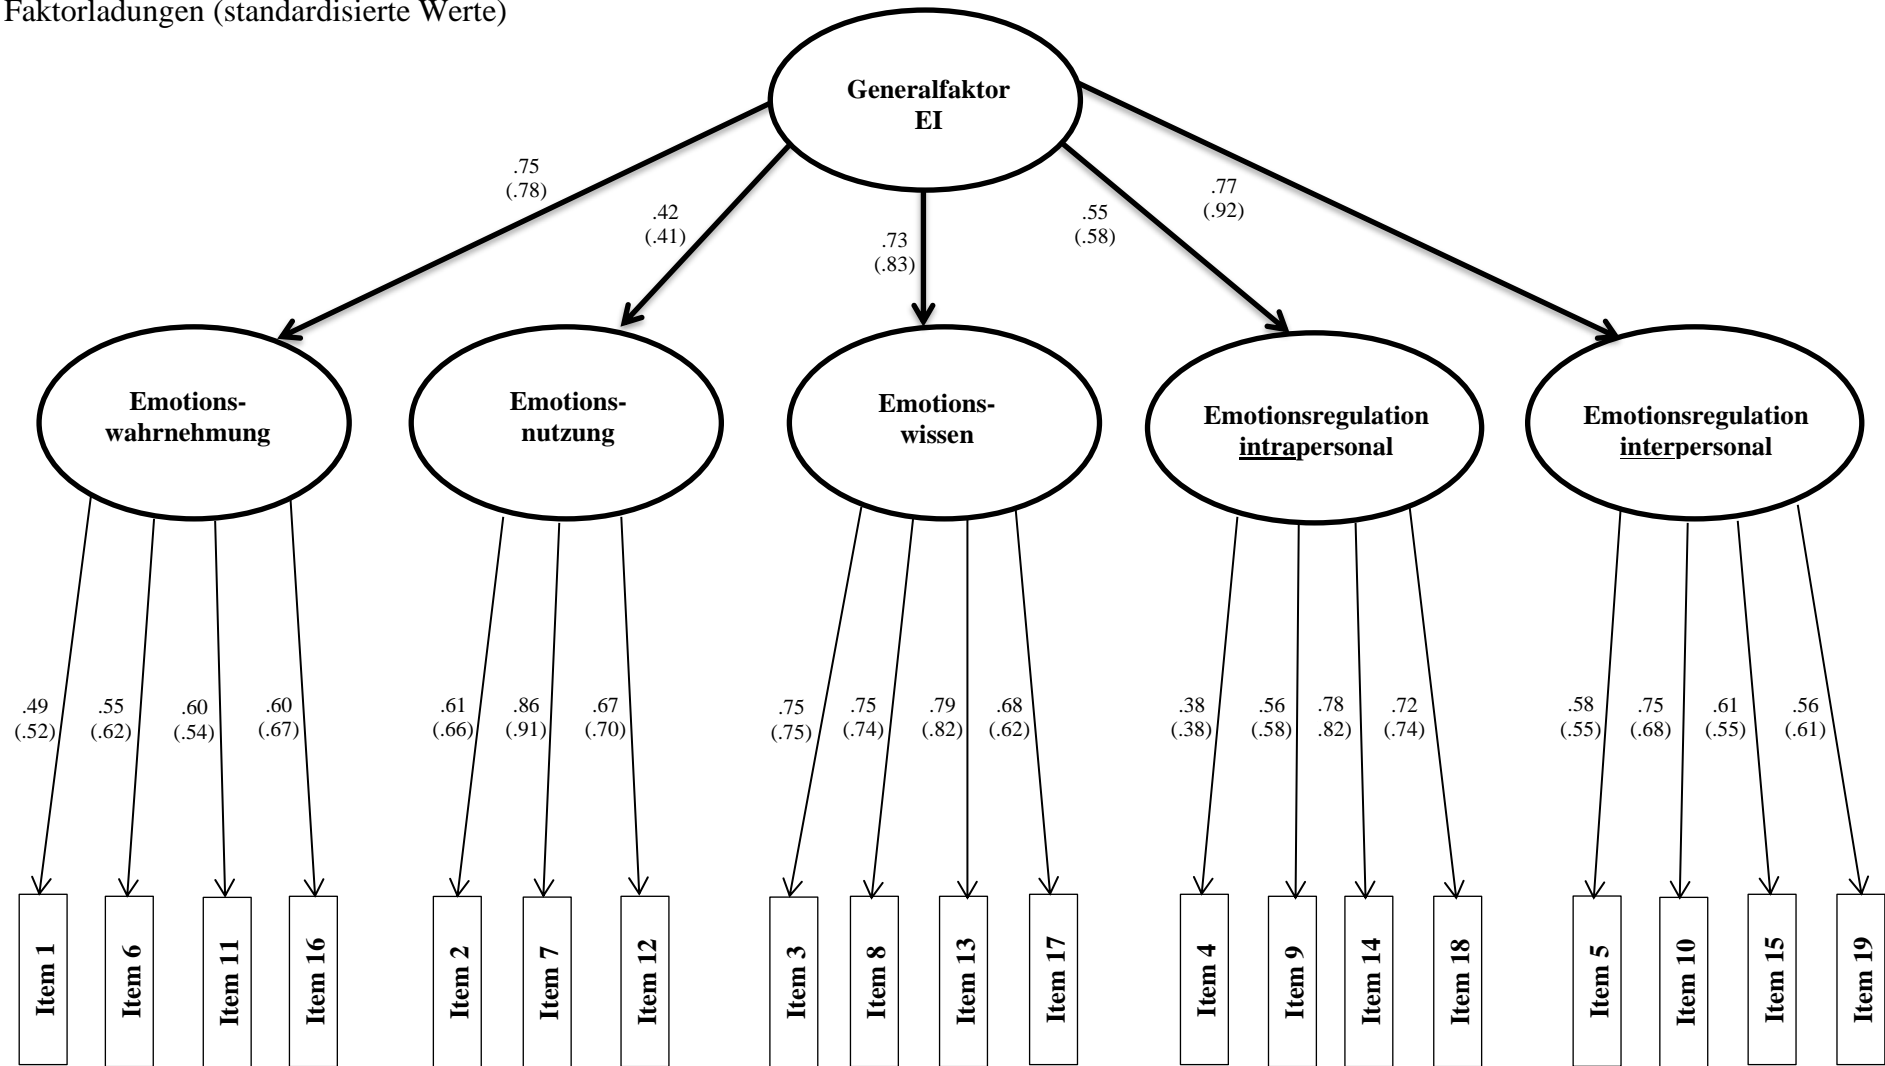

Anmerkung: Werte für die Pfadkoeffizienten der nicht-klinischen Kontrollgruppe ( $n = 218$ ) stehen jeweils unter dem Wert der klinischen Stichprobe ( $n = 338$ ) in Klammern. Zur besseren Darstellung wurden in der Abbildung die Fehlerterme (Messfehler der Items) nicht mit in die Ansicht aufgenommen.
