# Supplementary material for: SREIS-D
Source: Atypon-hosted journal article supplement (doi:10.1026/0012-1924/a000248), 2020-05-18
Supplement: 0012-1924_a000248_esm2.pdf [file 0012-1924_a000248_esm2.pdf]

**ESM 2. SREIS-D: Deskriptive Analysen auf Item- und Skalenebene für klinische Stichprobe bzw. nicht-klinische Kontrollgruppe und Mittelwertvergleich mit *t*-Tests für unabhängige Stichproben**

| Klinische Stichprobe |          |           |           |            |          |          | Nicht-klinische Kontrollgruppe |           |           |            |          |          | M - Vergleich |
|----------------------|----------|-----------|-----------|------------|----------|----------|--------------------------------|-----------|-----------|------------|----------|----------|---------------|
| Item Nr./Skala       | <i>M</i> | <i>SD</i> | <i>Pi</i> | <i>rit</i> | <i>v</i> | <i>w</i> | <i>M</i>                       | <i>SD</i> | <i>Pi</i> | <i>rit</i> | <i>v</i> | <i>w</i> | <i>d</i>      |
| Item 1               | 3.67     | 0.86      | .73       | .28        | -.312    | -.084    | 3.86                           | 0.74      | .77       | .44        | -.334    | .373     | 0.23          |
| Item 2               | 3.51     | 1.13      | .70       | .25        | -.310    | -.758    | 3.54                           | 1.00      | .71       | .33        | -.336    | -.672    | 0.03          |
| Item 3               | 3.12     | 1.13      | .62       | .56        | -.052    | -.636    | 3.60                           | 0.94      | .72       | .57        | -.266    | -.348    | 0.45          |
| Item 4               | 2.22     | 1.09      | .44       | .24        | .616     | -.399    | 3.05                           | 0.98      | .61       | .22        | .004     | -.341    | 0.79          |
| Item 5               | 3.49     | 0.94      | .70       | .42        | -.326    | -.158    | 3.80                           | 0.79      | .76       | .47        | -.363    | .130     | 0.35          |
| Item 6               | 3.73     | 0.98      | .75       | .36        | -.410    | -.242    | 4.06                           | 0.78      | .81       | .49        | -.752    | 1.122    | 0.35          |
| Item 7               | 3.41     | 1.04      | .68       | .43        | -.228    | -.444    | 3.76                           | 0.94      | .75       | .47        | -.256    | -.849    | 0.35          |
| Item 8               | 2.94     | 1.10      | .59       | .57        | .105     | -.730    | 3.47                           | 0.93      | .69       | .60        | -.130    | -.722    | 0.51          |
| Item 9               | 2.37     | 1.18      | .47       | .33        | .574     | -.509    | 3.22                           | 1.02      | .64       | .29        | -.174    | -.422    | 0.76          |
| Item 10              | 2.91     | 1.11      | .58       | .56        | -.125    | -.772    | 3.41                           | 0.97      | .68       | .55        | -.168    | -.656    | 0.47          |
| Item 11              | 2.91     | 0.91      | .58       | .42        | -.263    | -.110    | 3.13                           | 0.92      | .63       | .39        | -.196    | -.057    | 0.24          |
| Item 12              | 3.56     | 1.10      | .71       | .26        | -.275    | -.856    | 3.73                           | 1.01      | .75       | .36        | -.534    | -.251    | 0.16          |
| Item 13              | 2.86     | 1.16      | .57       | .57        | -.088    | -.773    | 3.34                           | 0.92      | .67       | .63        | -.265    | -.483    | 0.46          |
| Item 14              | 2.57     | 1.02      | .51       | .53        | .240     | -.491    | 3.52                           | 0.88      | .70       | .48        | -.445    | -.052    | 0.98          |
| Item 15              | 3.41     | 1.04      | .68       | .46        | -.399    | -.452    | 3.68                           | 0.92      | .74       | .46        | -.522    | -.178    | 0.27          |
| Item 16              | 3.72     | 0.90      | .74       | .38        | -.510    | .331     | 4.05                           | 0.73      | .81       | .55        | -.502    | .204     | 0.38          |
| Item 17              | 2.58     | 1.00      | .52       | .50        | .137     | -.391    | 2.94                           | 0.91      | .59       | .50        | .091     | -.094    | 0.37          |
| Item 18              | 2.60     | 1.07      | .52       | .47        | .293     | -.442    | 3.48                           | 0.93      | .70       | .40        | -.493    | .036     | 0.87          |
| Item 19              | 3.44     | 1.22      | .69       | .40        | -.356    | -.787    | 3.66                           | 0.89      | .73       | .52        | -.336    | -.043    | 0.20          |
| EmoW                 | 3.51     | 0.64      |           |            | -.222    | -.199    | 3.78                           | 0.57      |           |            | -.501    | .648     | 0.44          |
| EmoN                 | 3.49     | 0.90      |           |            | -.203    | -.482    | 3.68                           | 0.85      |           |            | -.365    | -.498    | 0.22          |
| EmoWi                | 2.87     | 0.90      |           |            | .038     | -.536    | 3.34                           | 0.75      |           |            | -.139    | -.293    | 0.56          |
| ERintra              | 2.51     | 0.88      |           |            | .386     | -.225    | 3.41                           | 0.77      |           |            | -.326    | -.212    | 1.07          |
| ERinter              | 3.31     | 0.79      |           |            | -.266    | -.329    | 3.64                           | 0.64      |           |            | -.181    | -.066    | 0.45          |
| SRges                | 3.13     | 0.54      |           |            | .112     | .009     | 3.57                           | 0.49      |           |            | -.256    | -.024    | 0.84          |

*Anmerkungen:* Klinische Stichprobe  $n = 338$ , nicht-klinische Kontrollgruppe  $n = 218$ . *M* = Mittelwert; *SD* = Standardabweichung; *Pi* = Itemschwierigkeit; *rit* = Trennschärfe; *v* = Schiefe; *w* = Kurtosis; *d* = Effektgröße nach Cohen. EmoW = Emotionswahrnehmung; EmoN = Emotionsnutzung; EmoWi = Emotionswissen; ERintra = Emotionsregulation intrapersonal; ERinter = Emotionsregulation interpersonal; SRges = SREIS-D Gesamtskala. Die Antwortskala der SREIS-D Einzelitems reicht von 1 (= unzutreffend) bis 5 (= zutreffend). Die Item- und Skalenmittelwerte sind analog zu bewerten.
